# Supplementary material for: Degradation of splicing factor SRSF3 contributes to progressive liver disease
Source: JCI journal article supplement (doi:10.1172/jci127374), 2019-08-08
Supplement: sd1 [file 1]

301 Moved Permanently

# Moved Permanently

The document has moved here.
